# Supplementary material for: Conditions for excellence in teaching in medical education: The Frankfurt Model to ensure quality in teaching and learning
Source: PubMed Central journal article supplement (PMC5654116; doi:10.3205/zma001123), 2017-10-16
Supplement: JME-34-46-s-001.pdf [file JME-34-46-s-001.pdf]

| <b>Organizational Structure / Medical School Culture [1], [9], [23–35]</b>                                                                                 | <b>exists</b> |
|------------------------------------------------------------------------------------------------------------------------------------------------------------|---------------|
| <b>Clear and public commitment of the medical school to teaching</b><br><i>Characteristics / Actions:</i>                                                  |               |
| <ul style="list-style-type: none"> <li>- Philosophy of teaching</li> </ul>                                                                                 |               |
| <ul style="list-style-type: none"> <li>- Visualization of the people responsible for academic teaching (organigram)</li> </ul>                             |               |
| <ul style="list-style-type: none"> <li>- Openly accessible information on times, rooms, teaching formats, learning objectives (online platform)</li> </ul> |               |
| <ul style="list-style-type: none"> <li>- Ongoing, confidence-building work of the executive committees</li> </ul>                                          |               |
| <ul style="list-style-type: none"> <li>- Showcasing of academic teaching (e.g. specific days dedicated to topics related to teaching)</li> </ul>           |               |
| <ul style="list-style-type: none"> <li>- Transparent and separate accounting for teaching and research</li> </ul>                                          |               |
| <ul style="list-style-type: none"> <li>- Teaching professorships / <i>Tenure track</i></li> </ul>                                                          |               |
| <b>Teacher Support</b><br><i>Characteristics / Actions:</i>                                                                                                |               |
| <ul style="list-style-type: none"> <li>- Structured mandatory incoming teacher training program (Inplacement)</li> </ul>                                   |               |
| <ul style="list-style-type: none"> <li>- Anchoring of teaching duties into faculty schedules</li> </ul>                                                    |               |
| <ul style="list-style-type: none"> <li>- Teacher training and development programs</li> </ul>                                                              |               |
| <ul style="list-style-type: none"> <li>- Individual incentive programs and appreciation for good teaching (Teacher of the Month/Year)</li> </ul>           |               |
| <ul style="list-style-type: none"> <li>- Management through institutionalized incentive programs</li> </ul>                                                |               |
| <b>Systematic Analysis of Quality of Teaching and Learning</b> (curriculum, module, and class session)<br><i>Characteristics / Actions:</i>                |               |
| <ul style="list-style-type: none"> <li>- Use of valid measuring instruments</li> </ul>                                                                     |               |
| <ul style="list-style-type: none"> <li>- Use of measuring criteria relevant to common clinical settings</li> </ul>                                         |               |
| <b>Educational Policy</b><br><i>Characteristics / Actions:</i>                                                                                             |               |
| <ul style="list-style-type: none"> <li>- Advancement of teaching on the level of (educational) policy making</li> </ul>                                    |               |
| <ul style="list-style-type: none"> <li>- Separate allocation of budgets for teaching and research</li> </ul>                                               |               |

|                                                                                                                                                                                                                                                                                                    |               |
|----------------------------------------------------------------------------------------------------------------------------------------------------------------------------------------------------------------------------------------------------------------------------------------------------|---------------|
| <b>Regulatory Framework</b>                                                                                                                                                                                                                                                                        | <b>exists</b> |
| <i>Characteristics / Actions:</i>                                                                                                                                                                                                                                                                  |               |
| <ul style="list-style-type: none"> <li>- Implementation of the legal frameworks for the purpose of: <ul style="list-style-type: none"> <li>- consistency using any flexibility to the advantage of teaching</li> <li>- complying with legal requirements (e.g. group sizes)</li> </ul> </li> </ul> |               |
| <b>Drafting rules and regulations at the level of the university and medical school</b> (study program, examinations, admission requirements)                                                                                                                                                      |               |
| <b>Influence</b> (if possible) <b>regarding legal requirements and statutes at the state and national level:</b>                                                                                                                                                                                   |               |
| <ul style="list-style-type: none"> <li>- <b>Germany:</b> Regulations governing medical licensure (ÄAppO), Regulations governing student admissions (KapVO), Framework act for higher education (HRG), State laws governing universities and higher education (LHG)</li> </ul>                      |               |
| <ul style="list-style-type: none"> <li>- <b>Austria:</b> University Act of 2002 (UG 2002), the rules and regulations of the specific universities</li> </ul>                                                                                                                                       |               |
| <ul style="list-style-type: none"> <li>- <b>Switzerland:</b> Act governing medical professions (MedBG), Cantonal rules for restricting admissions</li> </ul>                                                                                                                                       |               |
| <ul style="list-style-type: none"> <li>- Rules and regulations of the European Union [(<a href="http://eur-lex.europa.eu/legal-content/DE/TXT/?uri=celex:32013L0055">http://eur-lex.europa.eu/legal-content/DE/TXT/?uri=celex:32013L0055</a>)]</li> </ul>                                          |               |
| <b>Curricular Requirements</b> (explicit in curriculum) [36–56]                                                                                                                                                                                                                                    | <b>exists</b> |
| <b>Curricula based on Learning Theory</b> [ <a href="http://www.ibe.unesco.org/publications/educationalpracticesseriespdf/prac01e.pdf">http://www.ibe.unesco.org/publications/educationalpracticesseriespdf/prac01e.pdf</a> ]                                                                      |               |
| <i>Characteristics / Actions:</i>                                                                                                                                                                                                                                                                  |               |
| <ul style="list-style-type: none"> <li>- Curriculum with a consistent structure in alignment with the educational philosophy and profile of the medical school</li> </ul>                                                                                                                          |               |
| <ul style="list-style-type: none"> <li>- Learning objectives matched to expected outcomes (e.g. competencies or EPAs (entrustable professional activities) that should be present on the first day of the advanced training program</li> </ul>                                                     |               |
| <ul style="list-style-type: none"> <li>- Constructive alignment of curricula as a principle</li> </ul>                                                                                                                                                                                             |               |
| <ul style="list-style-type: none"> <li>- Fostering of self-directed learning</li> </ul>                                                                                                                                                                                                            |               |
| <b>Structured Curriculum Planning</b>                                                                                                                                                                                                                                                              |               |
| <i>Characteristics / Actions:</i>                                                                                                                                                                                                                                                                  |               |
| <ul style="list-style-type: none"> <li>- Theory-based approach</li> </ul>                                                                                                                                                                                                                          |               |
| <ul style="list-style-type: none"> <li>- During processes of fundamental change, project management should be adequately equipped and institutionally integrated</li> </ul>                                                                                                                        |               |

| Curricular Requirements (explicit in curriculum) (continuation)                                                                                                                                                                                                                           | exists |
|-------------------------------------------------------------------------------------------------------------------------------------------------------------------------------------------------------------------------------------------------------------------------------------------|--------|
| <b>Transparent Curricular Framework</b><br><i>Characteristics / Actions:</i><br>Definition of:                                                                                                                                                                                            |        |
| <ul style="list-style-type: none"> <li>- Teaching formats</li> </ul>                                                                                                                                                                                                                      |        |
| <ul style="list-style-type: none"> <li>- Hours, class times</li> </ul>                                                                                                                                                                                                                    |        |
| <ul style="list-style-type: none"> <li>- Classrooms</li> </ul>                                                                                                                                                                                                                            |        |
| <ul style="list-style-type: none"> <li>- Staff-student-ratio</li> </ul>                                                                                                                                                                                                                   |        |
| <ul style="list-style-type: none"> <li>- Relationship between theory and practice, transparent objectives, resources for self-guided exercises (learning center/skills lab), reserved time for e-learning and blended learning, elective courses for individual specialization</li> </ul> |        |
| <b>Transparent Assessments</b><br><i>Characteristics / Actions:</i>                                                                                                                                                                                                                       |        |
| <ul style="list-style-type: none"> <li>- Transparent learning objectives (e.g. listed online)</li> </ul>                                                                                                                                                                                  |        |
| <ul style="list-style-type: none"> <li>- Transparent examination procedures (registration deadlines, responsible people, objections and appeals procedures)</li> </ul>                                                                                                                    |        |
| <ul style="list-style-type: none"> <li>- Balance between formative and summative assessment formats</li> </ul>                                                                                                                                                                            |        |
| <ul style="list-style-type: none"> <li>- Routine determination of (interim) qualifications (e.g. OSCE to assess readiness for medical clerkship)</li> </ul>                                                                                                                               |        |
| <ul style="list-style-type: none"> <li>- Progress test in medicine (for intra- and inter-school comparisons)</li> </ul>                                                                                                                                                                   |        |
| <b>Student Participation</b><br><i>Characteristics / Actions:</i>                                                                                                                                                                                                                         |        |
| <ul style="list-style-type: none"> <li>- Student participation at institutional level (medical school bodies, curriculum commissions, course design, course evaluations)</li> </ul>                                                                                                       |        |
| <ul style="list-style-type: none"> <li>- Inclusion of students in teaching (tutor programs / peer-assisted learning)</li> </ul>                                                                                                                                                           |        |
| <b>Individual Support</b><br><i>Characteristics / Actions:</i>                                                                                                                                                                                                                            |        |
| <ul style="list-style-type: none"> <li>- Individualized elective offerings and specialty programs (e.g. MD/ PhD)</li> </ul>                                                                                                                                                               |        |
| <ul style="list-style-type: none"> <li>- Mentoring Programs</li> </ul>                                                                                                                                                                                                                    |        |
| <ul style="list-style-type: none"> <li>- Student advising</li> </ul>                                                                                                                                                                                                                      |        |
| <ul style="list-style-type: none"> <li>- Childcare</li> </ul>                                                                                                                                                                                                                             |        |

|                                                                                                                                                                                                                                         |               |
|-----------------------------------------------------------------------------------------------------------------------------------------------------------------------------------------------------------------------------------------|---------------|
| <b>Qualification of Teaching Staff [57–62]</b>                                                                                                                                                                                          | <b>exists</b> |
| <i>Characteristics / Actions:</i>                                                                                                                                                                                                       |               |
| - Focus on recommendations for teacher qualification                                                                                                                                                                                    |               |
| - Basic teacher qualification for all instructors                                                                                                                                                                                       |               |
| - Modular structure                                                                                                                                                                                                                     |               |
| - Medical teaching qualification regarding [the rules and regulations for] promotion and tenure                                                                                                                                         |               |
| - Coaching and mentoring programs for teaching staff                                                                                                                                                                                    |               |
| - Fostering communities of practice                                                                                                                                                                                                     |               |
| - Program certification, e.g. <i>Medizin Didaktik Netzwerk (MDN)</i> , <i>Certificate of Advanced Studies (CAS; 10 ECTS)</i> , <i>Diploma of Advanced Studies (DAS; 30 ECTS)</i> , or as a Master's degree program (60 ECTS, MME, etc.) |               |
| - <i>Tenure track</i> positions (professorships)                                                                                                                                                                                        |               |
| <b>Material and Personnel Resources [33] [63–65]</b>                                                                                                                                                                                    | <b>exists</b> |
| <b>Suitable and Sufficient Rooms</b>                                                                                                                                                                                                    |               |
| <i>Characteristics / Actions:</i>                                                                                                                                                                                                       |               |
| - Rooms suitable for the selected teaching formats (e.g. for lab practicums, small-group instruction, learning center/skills lab)                                                                                                       |               |
| - Audio / visual equipment (e.g. audio response systems, practice phantoms and models)                                                                                                                                                  |               |
| - Spaces for self-study (e.g. medical library, access to relevant literature and online training programs)                                                                                                                              |               |
| - Teaching spaces and changing rooms in the hospital                                                                                                                                                                                    |               |
| - Central classroom building / center for collaborative learning (if applicable with a dean of studies)                                                                                                                                 |               |
| - Central administration for optimal use of available rooms and spaces                                                                                                                                                                  |               |
| <b>Personnel Resources</b>                                                                                                                                                                                                              |               |
| <i>Characteristics / Actions:</i>                                                                                                                                                                                                       |               |
| - Qualified teaching staff (existence of training programs, leave to prepare, teach and wrap-up courses)                                                                                                                                |               |
| - Qualified academic personnel to develop the curriculum                                                                                                                                                                                |               |
| - Sufficient administrative and technical personnel                                                                                                                                                                                     |               |

|                                                                                                                                                                                                                                                |               |
|------------------------------------------------------------------------------------------------------------------------------------------------------------------------------------------------------------------------------------------------|---------------|
| <b>Time Constraints</b> [12], [27], [56], [66], [67]                                                                                                                                                                                           | <b>exists</b> |
| <i>Characteristics / Actions:</i>                                                                                                                                                                                                              |               |
| <b>Instructors</b>                                                                                                                                                                                                                             |               |
| - Calculation of teaching duties including actual classroom time, course preparation and organization, development and adaptation of lesson plans, modules and overall curriculum; for exams: time for preparation, administration and grading |               |
| <b>Students</b>                                                                                                                                                                                                                                |               |
| - No overlapping of mandatory courses in terms of scheduling                                                                                                                                                                                   |               |
| - Allowance for individual learning outside of the classroom sessions (preparation and follow-up, blended learning, exam preparation), as well as time for travel and breaks                                                                   |               |
| - Approximately 20 contact hours per weeks results in 50 – 60 hours of work per week and can be viewed as optional                                                                                                                             |               |
| <b>Criteria for Successful Teaching and Learning Outcomes</b> [9], [18], [47]                                                                                                                                                                  | <b>exists</b> |
| - Length of study                                                                                                                                                                                                                              |               |
| - Exam scores, if applicable with subject-related information                                                                                                                                                                                  |               |
| - Results of progress tests (cross-sectional and longitudinal)                                                                                                                                                                                 |               |
| - Cross-medical school comparisons of OSCE scores (standardized stations)                                                                                                                                                                      |               |
| - Results of graduate surveys, e.g. career development analysis                                                                                                                                                                                |               |
| - Student satisfaction                                                                                                                                                                                                                         |               |
